Review

# Redox regulation of cardiac calcium channels and transporters

Aleksey V. Zima, Lothar A. Blatter\*

Department of Physiology, Stritch School of Medicine, Loyola University Chicago, 2160 South First Avenue, Maywood, IL 60153, USA

Received 2 December 2005; received in revised form 14 February 2006; accepted 17 February 2006

Available online 6 March 2006

Time for primary review 32 days

## Abstract

Intracellular concentrations of redox-active molecules can significantly increase in the heart as a result of activation of specific signal transduction pathways or the development of certain pathophysiological conditions. Changes in the intracellular redox environment can affect many cellular processes, including the gating properties of ion channels and the activity of ion transporters. Because cardiac contraction is highly dependent on intracellular  $\text{Ca}^{2+}$  levels ( $[\text{Ca}^{2+}]_i$ ) and  $[\text{Ca}^{2+}]_o$  regulation, redox modification of  $\text{Ca}^{2+}$  channels and transporters has a profound effect on cardiac function. The sarcoplasmic reticulum (SR)  $\text{Ca}^{2+}$  release channel, or ryanodine receptor (RyR), is one of the well-characterized redox-sensitive ion channels in the heart. The redox modulation of RyR activity is mediated by the redox modification of sulfhydryl groups of cysteine residues. Other key components of cardiac excitation–contraction (e–c) coupling such as the SR  $\text{Ca}^{2+}$  ATPase and L-type  $\text{Ca}^{2+}$  channel are subject to redox modulation. Redox-mediated alteration of the activity of ion channels and pumps is directly involved in cardiac pathologies such as ischemia–reperfusion injury. Significant bursts of reactive oxygen species (ROS) generation occur during reperfusion of the ischemic heart, and changes in the activity of the major components of  $[\text{Ca}^{2+}]_i$  regulation, such as RyR,  $\text{Na}^+$ – $\text{Ca}^{2+}$  exchange and  $\text{Ca}^{2+}$  ATPases, are likely to play an important role in ischemia-related  $\text{Ca}^{2+}$  overload. This article summarizes recent findings on redox regulation of cardiac  $\text{Ca}^{2+}$  transport systems and discusses contributions of this redox regulation to normal and pathological cardiac function.

© 2006 European Society of Cardiology. Published by Elsevier B.V. All rights reserved.

**Keywords:** Ca-channel; Ca-pump; e–c coupling; Oxygen radicals; Redox signaling

## 1. Introduction

Changes in the reduction/oxidation (redox) state of proteins play an important role in many cellular functions including immunological host defense, gene transcription, cellular metabolism, ionic homeostasis and signal transduction. Typically, sulfhydryl (SH) groups of cysteine residues are potential targets for redox modification of proteins. Alteration in the redox state of SH groups of two neighboring cysteine residues can lead to formation or breaking of disulfide bonds. This redox modification of disulfide bonds affects the structure and function of ion regulatory proteins including ion channels, pumps and transporters. It is well established that the activity of various ion regulatory proteins can be modulated by redox-

dependent mechanisms [1–3]. Dependent on the type of channel, pump and other transporters, the redox modification has a variety of different functional consequences. For example, reagents that oxidize thiols activate cardiac ryanodine receptor (RyR) channels [4] (see Table 1), but inhibit the sarcoplasmic reticulum (SR)  $\text{Ca}^{2+}$  ATPase (SERCA) [5]. The specificity of redox modulation depends on many factors including the redox state of the intracellular (micro-)environment, and concentration and nature of redox active molecules. At low levels these redox active molecules constitute a basal endogenous redox buffering system that reversibly interacts with specific cellular targets and generates an environment tailored towards optimal performance of ion channels and transporters. At high concentrations, however—often encountered transiently or permanently under pathological conditions—redox active species are capable of irreversibly modifying enzyme function or even damaging proteins.

\* Corresponding author. Tel.: +1 708 216 1182; fax: +1 708 216 6308.

E-mail address: lblatte@lumc.edu (L.A. Blatter).

Table 1  
Effects of the redox modification of sulfhydryl groups of cardiac  $\text{Ca}^{2+}$  channels and transporters

|                                                           | Effects of compounds that oxidize SH groups                                                                                                                                                                                                                                                                                                                        | Effects of compounds that reduce SH groups                                                                                   | Effects of compounds that S-nitrosylate SH groups                                                                                                                                                                                   |
|-----------------------------------------------------------|--------------------------------------------------------------------------------------------------------------------------------------------------------------------------------------------------------------------------------------------------------------------------------------------------------------------------------------------------------------------|------------------------------------------------------------------------------------------------------------------------------|-------------------------------------------------------------------------------------------------------------------------------------------------------------------------------------------------------------------------------------|
| Ryanodine receptor (RyR) $\text{Ca}^{2+}$ release channel | Thiol oxidizing agents (thimerosal, DTDP, DTNB) in submillimolar concentrations increased RyR channel activity [47,52,53] ROS ( $\text{O}_2^-$ and $\text{H}_2\text{O}_2$ ) increased the open probability of RyR [4,58,61,63] ROS caused initial stimulation, followed by inactivation of RyR [64]                                                                | Reagents that reduce thiols ( $\beta$ -mercaptoethanol, DTT, GSH and NADH) decreased RyR activity [53,57,61]                 | S-nitrosothiols (CysNO 0.1 mM; GSNO 1 mM and SNAP 1 mM) and NO/ONOO <sup>-</sup> donor SIN-1 (0.2 mM) stimulated channel activity. The effect was reversed by DTT [44,70] L-arginine-derived NO inhibited RyR channel activity [71] |
| Voltage-dependent L-type $\text{Ca}^{2+}$ channel         | Thiol oxidizing agents (thimerosal, PCMBs, PHMPS, MTSEA) decreased both $I_{\text{Ca}}$ and $I_{\text{Ba}}$ through $\alpha_{1\text{C}}$ subunit; effect was reversed by DTT [92–94] ROS generated from X+XO or $\text{H}_2\text{O}_2$ decreased $I_{\text{Ca}}$ [95,96] Thiol oxidizing agent (DTNB; submillimolar concentration) stimulated $I_{\text{Ca}}$ [97] | DTT (1–2 mM) did not affect $I_{\text{Ca}}$ [92,94]. Millimolar concentrations of DTT and GSH inhibited $I_{\text{Ca}}$ [97] | CysNO, GSNO and SNAP inhibited $I_{\text{Ba}}$ [93] CysNO, GSNO and SIN-1 (all 1 mM) stimulated $I_{\text{Ca}}$ [97]                                                                                                                |
| SR $\text{Ca}^{2+}$ ATPase (SERCA)                        | Reagents that oxidize thiols inhibited SERCA activity [99,100] ROS ( $\text{O}_2^-$ and $\text{H}_2\text{O}_2$ ) inhibited SR $\text{Ca}^{2+}$ uptake [5,58,100–103]                                                                                                                                                                                               | DTT and GSH protected against thiol oxidant effects [99]                                                                     | S-nitrosothiols did not affect SERCA activity [70,74,104] ONOO <sup>-</sup> (10–50 $\mu\text{M}$ ) increased activity of SERCA2 [104]                                                                                               |
| $\text{Na}^+$ – $\text{Ca}^{2+}$ exchange (NCX)           | ROS generated from X+XO and $\text{H}_2\text{O}_2$ enhanced NCX-mediated $\text{Ca}^{2+}$ fluxes [109,110,112,113] GSH/GSSG (1–2 mM) stimulated NCX [109] Strong oxidant HOCl inhibited NCX [110]                                                                                                                                                                  | DTT and GSH did not affect NCX [111]                                                                                         |                                                                                                                                                                                                                                     |
| Plasmalemmal $\text{Ca}^{2+}$ ATPase (PMCA)               | ROS generated from X+XO and $\text{H}_2\text{O}_2$ decreased PMCA activity [105,106]                                                                                                                                                                                                                                                                               |                                                                                                                              |                                                                                                                                                                                                                                     |

CysNO: S-nitrocysteine; DTDP: 2,2'-dithiodipyridine; DTNB: 5,5'-dithio-bis(2-nitrobenzoic acid); DTT: dithiothreitol; GSH: glutathione; GSNO: S-nitrosoglutathione;  $I_{\text{Ba}}$ : barium current;  $I_{\text{Ca}}$ : calcium current; MTSEA: (2-aminoethyl)methanethiosulphonate; ONOO<sup>-</sup>: peroxynitrite; PCMBs: *p*-chloromercuribenzenesulphonic acid; PHMPS: *p*-hydroxy-mercuric-phenylsulphonic acid; ROS: reactive oxygen species; SNAP: N-Acetyl-3-(nitrosothio)-D-valine; X+XO: xanthine+xanthineoxidase reaction.

In the following paragraphs we will review the cellular components that maintain the systolic redox milieu, and we will focus on how redox modulation of  $\text{Ca}^{2+}$  regulatory proteins affect cardiac excitation–contraction (e–c) coupling and function under physiological and pathophysiological conditions.

## 2. Intracellular redox potential and redox buffering system

The redox status of the intracellular milieu is controlled by a variety of redox active compounds. Reactive oxygen species (ROS) and reactive nitrogen species (RNS) are considered the major biologically relevant redox active molecules, whereas glutathione (together with the glutathione peroxidase/reductase system), nicotinamide-adenine dinucleotide redox couple (NADH/NAD<sup>+</sup>), the thioredoxin (Trx) system and the enzymes superoxide dismutase and catalase constitute the key elements of cellular defense against redox injuries. Because levels of ROS and RNS can increase significantly after stimulation of specific signal transduction pathways or during certain pathological conditions of the heart (e.g. ischemia–reperfusion) the redox defense system is essential for the maintenance of cellular homeostasis.

### 2.1. Glutathione

In many mammalian cells, including cardiomyocytes, glutathione is considered the major cytosolic redox buffer. Under normal physiological conditions, glutathione is mainly reduced. The ratio of reduced glutathione (GSH) to glutathione disulfide (GSSG; oxidized form) is  $>10$  [6], however, under pathological conditions the GSH/GSSG ratio can decrease significantly [7]. The pentose phosphate pathway regulates the GSH/GSSG ratio by providing nicotinamide-adenine dinucleotide phosphate (NADPH), which is required for the reduction of GSSG to GSH by glutathione reductase. The maintenance of a high cytosolic GSH/GSSG ratio is a critical factor in antioxidant defense. GSH can directly scavenge free radicals including ROS or indirectly through the reaction catalyzed by glutathione peroxidase.

### 2.2. NADH/NAD<sup>+</sup>

In contrast to glutathione, under normal aerobic conditions, cytosolic nicotinamide-adenine dinucleotides are mostly oxidized (i.e. present in form of NAD<sup>+</sup>) with an NADH/NAD<sup>+</sup> ratio  $<0.05$  [8]. This low ratio is the result of a low glycolytic flux and the ability of mitochondria to

oxidize cytosolic NADH by the malate-aspartate and  $\alpha$ -glycerol phosphate shuttles [9]. The ratio of NADH/NAD<sup>+</sup> fluctuates in response to changes in metabolism and can be interpreted as an indicator of the metabolic state of a cell or tissue. During ischemia, for example, cytosolic NADH/NAD<sup>+</sup> ratio can increase up to 30 times [10].

Cytosolic GSH/GSSG or NADH/NAD<sup>+</sup> ratios are usually estimated from whole cell extracts, providing only information about global changes in redox state of the cytosol. Due to specific localization of enzymes regulating cytosolic redox levels, it seems likely that redox regulation is highly compartmentalized with cytosolic subregions having variable redox states. For example, glyceraldehyde 3-phosphate dehydrogenase (GAPDH), a key enzyme which regulates cytosolic NADH/NAD<sup>+</sup> levels, is associated with the SR membrane [12]. Thus, changes in activity of this enzyme may lead to more significant fluctuations of local NADH/NAD<sup>+</sup> levels in close proximity to SR bound proteins (such as the RyR and SERCA) than in the bulk cytosol.

### 2.3. Thioredoxin

The thioredoxin (Trx) system, which consists of Trx reductase and Trx peroxidase, is another important cellular system that regulates the redox state of the cytosol [13]. The Trx system plays an important role in cardioprotection against ROS by directly scavenging hydrogen peroxide and regulating signal transduction pathways [14,15].

### 2.4. Reactive oxygen species (ROS)

ROS are intermediates of the reduction of O<sub>2</sub> to water and include superoxide anion (O<sub>2</sub><sup>-</sup>), hydroxyl radical (OH<sup>·</sup>) and hydrogen peroxide (H<sub>2</sub>O<sub>2</sub>). ROS play a critical role in many disorders of the cardiovascular system (e.g. [16–19]), such as ischemia–reperfusion injury, myocardial stunning, apoptosis, inflammation and arteriosclerosis. Potential sources of ROS include the mitochondrial electron transport chain, xanthineoxidase, cytochrome P450-based enzymes and NADH oxidase. Under certain conditions accumulation of ROS can trigger a burst of ROS production (“ROS-induced ROS release”) by mitochondria that can lead to apoptotic cell death [20]. Superoxide dismutase (SOD), catalase and glutathione peroxidase are the main enzymatic components of cellular defense against oxidative damage. Furthermore, endogenous antioxidants including GSH, tocopherols, and ascorbic acid also participate in scavenging free radicals. Therefore, for normal functioning of the cell, the control of the balance between ROS production and elimination is pivotal. For example, a significant burst of ROS formation occurs during reperfusion of the ischemic heart [21–23], however, the exact source and mechanism of ROS formation during reoxygenation remains to be determined. In bovine cardiac myocytes a major source of O<sub>2</sub><sup>-</sup> production stems from a membrane associated NADH

oxidase, an enzyme controlled by cytosolic NADH/NAD<sup>+</sup> levels and oxygen pressure ( $pO_2$ ) [24]. Inhibition of NADH oxidase activity substantially suppresses ROS production [24,25]. Reperfusion after ischemia also leads to dramatic changes of Ca<sup>2+</sup> homeostasis and e–c coupling, a process in which ROS play a crucial role [16]. Accumulation of ROS leads to cardiac Ca<sup>2+</sup> overload [23,26,27] and it has been suggested that redox modulation of ion channel and pump activity is directly responsible for these pathological processes [1].

In addition to the well recognized role of ROS in acute ischemia/reperfusion-related Ca<sup>2+</sup> overload, it is becoming increasingly evident that ROS also participate in signal transduction processes that control gene expression, cell growth and apoptosis. ROS production increases after receptor stimulation by specific hormones, growth factors and cytokines [17]. For example, in ventricular myocytes stimulation of  $\alpha_1$ -adrenergic receptors activates NADPH oxidase-mediated ROS production and hypertrophic signaling pathways [28]. In contrast to the damaging effects of high concentrations of ROS, low levels of ROS participate in cellular signal transduction via modulation of SR Ca<sup>2+</sup> release [29] or play a role in preconditioning-dependent myocardial protection against ischemia–reperfusion injury [30].

### 2.5. Nitric oxide (NO)

NO is generated by the family of enzymes of 3 isoforms of NO synthase (NOS): endothelial (eNOS), neuronal (nNOS) and inducible (iNOS) isoenzyme. eNOS is the predominant isoform in the heart [31] where it is preferentially located in caveolae of the sarcolemma in the vicinity of  $\beta$ -adrenergic receptors and L-type Ca<sup>2+</sup> channels [32]. nNOS has been found targeted to the SR and associated with the RyR Ca<sup>2+</sup> release channel [32,33]. Co-localization of NOS with Ca<sup>2+</sup> transport systems suggests an important role of NO in the regulation of cardiac e–c coupling. In the absence of sufficient amounts of substrate (L-arginine) or co-factors (tetrahydrobiopterin) NOS can produce O<sub>2</sub><sup>-</sup> [34,35]. Furthermore, because NO and O<sub>2</sub><sup>-</sup> combine spontaneously to form peroxynitrite (ONOO<sup>-</sup>), NOS activity indirectly can contribute to ONOO<sup>-</sup> levels. Thus, by means of generating NO, O<sub>2</sub><sup>-</sup> and ONOO<sup>-</sup>, NOS plays an important role in both ischemia–reperfusion injury and preconditioning [36]. In the normal heart the expression of iNOS is very low, however can significantly increase during pathological conditions such as cardiac infarction or inflammation [37], and a constitutive NOS can mediate negative inotropic effects of pro-inflammatory cytokines [38]. NOS has also been located to mitochondria in a variety of tissues, including the heart [39], where NO production can exert fast local modulatory effects on mitochondrial Ca<sup>2+</sup> homeostasis, cell respiration, mitochondrial membrane potential and apoptosis.

### 3. Redox modulation of cardiac ion channels and transporters

Contraction of cardiac myocytes is activated by an action potential-induced membrane depolarization and subsequent  $\text{Ca}^{2+}$  entry through dihydropyridine-sensitive L-type  $\text{Ca}^{2+}$  channels. This relatively small  $\text{Ca}^{2+}$  influx triggers the opening of SR  $\text{Ca}^{2+}$  release channels (RyRs), resulting in a massive  $\text{Ca}^{2+}$  release from the SR  $\text{Ca}^{2+}$  store. This mechanism which mediates the process of cardiac e–c coupling is known as  $\text{Ca}^{2+}$ -induced  $\text{Ca}^{2+}$  release (CICR) [40]. The global  $\text{Ca}^{2+}$  release is the result of spatial and temporal summation of many localized elementary  $\text{Ca}^{2+}$  release events, termed  $\text{Ca}^{2+}$  sparks [41]. Cardiac relaxation is due to termination of  $\text{Ca}^{2+}$  release with subsequent reuptake of cytosolic  $\text{Ca}^{2+}$  into the SR by SERCA and extrusion predominantly by  $\text{Na}^+$ – $\text{Ca}^{2+}$  exchange (NCX) [42]. The relative contributions of NCX and SERCA to  $\text{Ca}^{2+}$  removal vary from species to species, whereas the sarcolemmal (plasmalemmal)  $\text{Ca}^{2+}$  ATPase (PMCA) plays a minor role [42]. In the following sections we review redox modulation of key  $\text{Ca}^{2+}$  channels and transporter relevant to cardiac e–c coupling.

#### 3.1. Ryanodine receptor (RyR) $\text{Ca}^{2+}$ release channel

$\text{Ca}^{2+}$  release from the SR through RyR channels is essential for activation of cardiac and skeletal muscle contraction. Three isoforms of RyR have been identified. The RyR1 isoform is dominant in skeletal muscles, whereas the RyR2 represents the cardiac RyRs isoform. The RyR3 isoform is found only at low expression levels in certain skeletal muscle types. At the amino acid level, the three mammalian RyR isoforms share ~70% identity [43]. The RyR has multiple sites for regulation, including cytosolic and luminal sites for regulation by  $\text{Ca}^{2+}$ , and cytosolic sites for  $\text{Mg}^{2+}$ , ATP, calmodulin (CaM) and FK-506 binding proteins (FKBP) [43]. The RyR, a tetrameric complex (~2.5MDa), contains up to 89 cysteine residues per monomer [44]. However, only a small number of hyperactive SH groups on the channel protein appear to have a redox-sensing function [2,45,46]. Reagents that specifically oxidize free SH groups and promote the formation of disulfide bonds within the RyR complex (2,2'-dithiodipyridine (DTDP) or 5,5'-dithio-bis(2-nitrobenzoic acid) (DTNB)) activate the channel. This effect is reversed by reagents that reduce disulfides to thiols (e.g. dithiothreitol (DTT)) [47–51]. The redox modulation of the RyR can also lead to alteration of the sensitivity of the channel to cytosolic  $\text{Ca}^{2+}$  and ATP [52,53]. Redox modification of cysteine residues alters the interaction of the RyR with triadin [46]. Triadin, a transmembrane ancillary protein, regulates the sensitivity of the RyR to luminal  $\text{Ca}^{2+}$  by stabilizing the binding of calsequestrin (an intra-SR  $\text{Ca}^{2+}$  binding protein) to the RyR [54]. Therefore, changes of the redox status of RyR SH groups may alter the sensitivity of the channel to both cytosolic and luminal  $\text{Ca}^{2+}$ . The intracellular

redox buffer GSH/GSSG modulates RyR1 and RyR2 function: reducing conditions inhibit, whereas oxidizing conditions stimulate the activity of the channel [48,53,55,56]. The mechanism of redox modulation of RyR by GSH/GSSG involves an interaction with the CaM binding site of the channel. Oxidized glutathione (GSSG) stimulates RyR2 activity by decreasing the affinity of CaM to bind to the RyR [56]. Recent data from our laboratory demonstrated that the cytosolic redox buffer NADH modulates gating properties of the cardiac RyR [57–59]. NADH inhibited the current through RyR2 channels by a mechanism that required oxidation of NADH and was reversed by  $\text{NAD}^+$  (Fig. 1A) and NADH significantly depressed local SR  $\text{Ca}^{2+}$  release ( $\text{Ca}^{2+}$  sparks) in isolated ventricular myocytes (Fig. 1B) [58]. Fig. 1C shows that  $\text{Ca}^{2+}$  spark frequency depends on the cytosolic NADH/ $\text{NAD}^+$  ratio with reducing conditions (NADH/ $\text{NAD}^+$  >1) significantly depressing  $\text{Ca}^{2+}$  sparks. At this moment, we do not know whether NADH directly interacts with cardiac RyR or with some ancillary proteins that remain associated to the RyR channel after incorporation into the bilayer. In support of this notion, skeletal muscle RyR1 contains an oxidoreductase-like domain that could function as a redox sensor [60].

RyR function is also affected by ROS. The majority of studies suggest that ROS effects are mediated via oxidation of SH groups of the RyR [1]. It has been shown that  $\text{O}_2^-$  [4,58] and  $\text{H}_2\text{O}_2/\text{OH}^\cdot$  [61–63] increase the open probability of cardiac and skeletal muscle RyRs and this effect is reversed by agents that reduce thiol groups, such as DTT. There is also evidence that after initial stimulation of channel activity, ROS can cause irreversible inactivation of RyRs [64]. The effects of ROS are likely to depend on concentration and the length of exposure. Experiments on single ventricular myocytes indicate that  $\text{H}_2\text{O}_2$  causes  $\text{Ca}^{2+}$  overload as a result of activation of  $\text{Ca}^{2+}$  release from intracellular stores, but not from activation of voltage-dependent  $\text{Ca}^{2+}$  channels or NCX [27]. This observation is consistent with our previous work showing that  $\text{O}_2^-$ , generated from the xanthine/xanthineoxidase (X+XO) reaction, stimulates RyR2 channels incorporated into lipid bilayers (Fig. 2A) and local SR  $\text{Ca}^{2+}$  release in isolated ventricular myocytes (Fig. 2B) [58]. After an initial stimulation of release, prolonged exposure to  $\text{O}_2^-$  caused depletion of SR  $\text{Ca}^{2+}$  as a result of inhibition of SERCA (see below). Qualitatively similar results were obtained with OH generated from *t*-butyl hydroperoxide (*t*-BHP). In ventricular cells, OH $^\cdot$  caused pro-arrhythmogenic spontaneous  $\text{Ca}^{2+}$  waves that were interspersed between electrically triggered  $[\text{Ca}^{2+}]_i$  transients (Fig. 2C).

There are, however, significant experimental limitations of studying ROS-dependent modulation of intracellular signaling. Traditionally, exogenous ROS generating systems (such as the X+XO reaction) have been used, which cause a global increase in [ROS]. Due to high reactivity of free radicals, OH $^\cdot$  and  $\text{O}_2^-$  have very limited diffusion distance in the range of only a few nanometers [65]. This fact

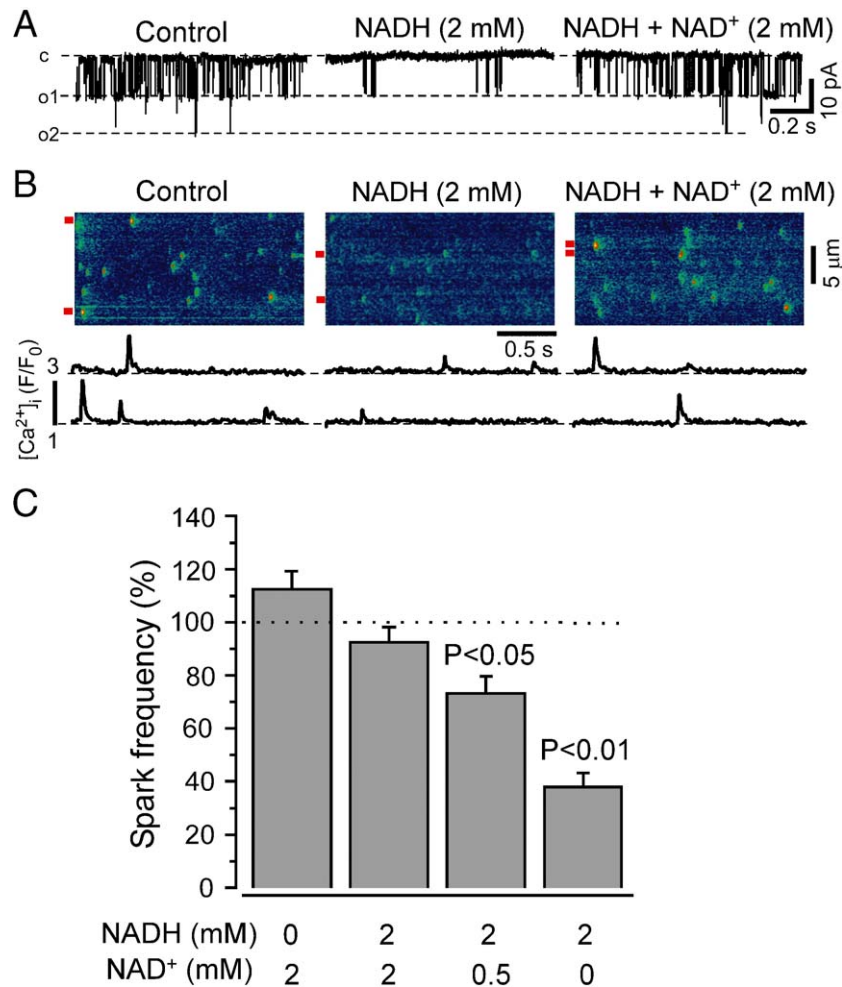

Fig. 1. NADH inhibits ryanodine receptor (RyR) activity and spontaneous Ca<sup>2+</sup> sparks in ventricular myocytes. A, Effect of NADH and NAD<sup>+</sup> on single RyR channel activity (lipid bilayer measurements; holding potential = -20 mV; *cis*[Ca<sup>2+</sup>] = 3 μM). B, Effect of NADH and NAD<sup>+</sup> on Ca<sup>2+</sup> spark activity in saponin-permeabilized ventricular myocytes. Confocal linescan images (fluoro-3 fluorescence) and local F/F<sub>0</sub> profiles of Ca<sup>2+</sup> release events. C, Average data of effects of different NADH/NAD<sup>+</sup> ratios on Ca<sup>2+</sup> spark frequency. 100% = spark frequency in the absence of NADH and NAD<sup>+</sup>. For details see [57,58]. Modified from [58].

suggests that ROS produced by endogenous systems would predominantly affect closely apposed targets, indicating that redox modulation is highly compartmentalized. In support of this notion both cardiac and skeletal RyRs were found to co-localize with an NADH oxidase, and locally generated O<sub>2</sub><sup>-</sup> can stimulate RyR channel activity [66,67].

The mechanisms of NO action on the gating properties of the RyR remain controversial. Activation of NOS generates NO free radicals (NO). NO can stimulate cGMP-mediated pathways by activating guanylate cyclase [68]. Furthermore, NO can freely oxidize to nitrosonium ion (NO<sup>+</sup>) which can react with SH groups of cysteine residues, forming S-nitrosothiol [69]. The reaction of S-nitrosylation requires electron acceptors, such as O<sub>2</sub> or NAD<sup>+</sup>. Nitrosylation of SH groups of the cardiac RyR by low molecular weight S-nitrosothiols, such as or S-nitrosoglutathione (GSNO) and S-nitrocysteine (CysNO), stimulates channel activity [44,70] (Fig. 3). SIN-1 (3-morpholinosydnonimine) which generates the NO-related species peroxynitrite activates the channel several fold through thiol oxidation [44]. On the

other hand, NO produced endogenously by NOS located to the cardiac SR decreases the open probability of the RyR [71]. It seems that effects of NO or NO-related molecules depend on concentration and cytosolic environment. Low concentrations of NO donors have been shown to activate the RyR, whereas high concentrations cause inhibition of the channel [72]. The mechanisms of NO-mediated modulation of the skeletal RyR have been explored in more detail. It has been shown that from 50 free thiols per subunit of RyR1 only S-nitrosylation of one single cysteine, Cys3635, is responsible for activation of the channel by NO [73]. Substitution of Cys3635 abolishes NO effects, but does not prevent redox modulation of RyR by GSH/GSSG suggesting that more than one SH group of the RyR play a redox-sensing function. Cysteine residues could only be nitrosylated at low (i.e. physiological) pO<sub>2</sub>, suggesting that this effect of NO was oxygen tension-dependent [73,74]. These results contrast the finding that NO failed to modulate RyR1 channel activity over a wide pO<sub>2</sub> range [75]. At the same time, S-nitrosothiols (CysNO or GSNO) modulate RyR

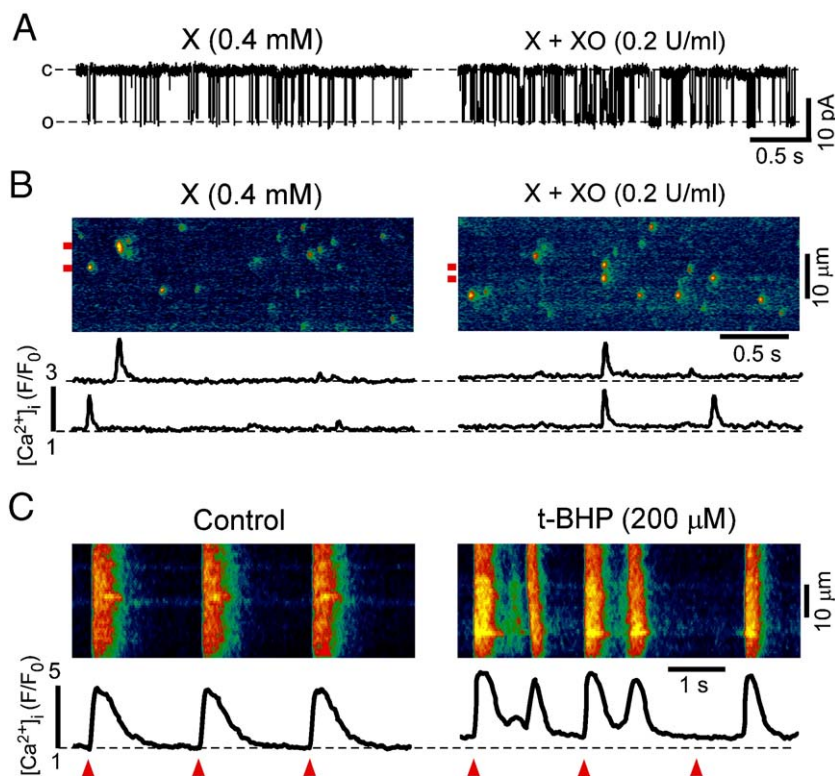

Fig. 2. ROS generated from xanthine/xanthineoxidase (X+XO) reaction and *t*-butyl hydroperoxide (*t*-BHP) stimulates single RyR activity, Ca<sup>2+</sup> sparks and electrically evoked [Ca<sup>2+</sup>]<sub>i</sub> transients in ventricular myocytes. A, RyR single channel recordings in the presence of 0.4mM X and after addition of 0.2U/ml XO. B, Ca<sup>2+</sup> spark activity in the presence of 0.4mM X and after addition of 0.2U/ml XO in permeabilized ventricular myocytes. C, [Ca<sup>2+</sup>]<sub>i</sub> transients in control conditions and in the presence of 200µM *t*-BHP. Electrical stimulations are indicated by triangles. For details see [58]. Panels A and B modified from [58].

through nitrosylation of cysteine residues other than Cys3635 [76]. There is also evidence that nitroxyl (HNO), another byproduct of NO synthesis, can activate cardiac and skeletal RyR channels by a mechanism different from *S*-nitrosylation [77].

### 3.2. Inositol-1,4,5-trisphosphate receptor (IP<sub>3</sub>R) channel

Similar to the RyR there are also three IP<sub>3</sub>R isoforms referred to as type-1, -2 and -3, transcribed by three distinct genes [78]. Each IP<sub>3</sub>R subtype has a different affinity for IP<sub>3</sub> and a specific tissue expression pattern. The role of IP<sub>3</sub>R in mobilization of Ca<sup>2+</sup> from intracellular stores in non-excitable cells is well established [79]. In contrast, in the heart the main pathway of Ca<sup>2+</sup> release occurs through RyRs, and IP<sub>3</sub>Rs (type-2) are expressed at 1–2 orders of magnitude lower density than RyRs [80]. Thus, the role of IP<sub>3</sub> in cardiac e–c coupling in the adult mammalian heart has remained highly controversial [42,81], however there is growing evidence that Ca<sup>2+</sup> release via IP<sub>3</sub>R modulates e–c coupling and contributes to arrhythmias in atrial tissue [82,83].

Evidence for redox modulation of the IP<sub>3</sub>R stems only from non-muscle tissue. In HeLa cells the thiol reagent thimerosal stimulates Ca<sup>2+</sup> release from intracellular stores by sensitizing the IP<sub>3</sub>R to basal IP<sub>3</sub> levels [84]. This effect of thimerosal was reversed by DTT, suggesting that redox modification of SH groups of the IP<sub>3</sub>R protein might be

involved. In permeabilized hepatocytes oxidized glutathione (GSSG) stimulates the IP<sub>3</sub>R by increasing the binding affinity of IP<sub>3</sub> to the receptor [85]. Furthermore, it has been shown recently that the glycolytic enzyme GAPDH is associated with the IP<sub>3</sub>R suggesting that changes in the formation of NADH may also regulate Ca<sup>2+</sup> signaling through IP<sub>3</sub>R [86]. In cerebellum, for example, NADH increased IP<sub>3</sub>-mediated Ca<sup>2+</sup> flux through the purified IP<sub>3</sub>R [87].

The IP<sub>3</sub>R can also be modulated by ROS. *t*-BHP increased IP<sub>3</sub>R-mediated Ca<sup>2+</sup> release in hepatocytes. This effect could be mimicked by the addition of GSSG and reversed by pretreatment with DTT [88]. O<sub>2</sub><sup>•−</sup> generated from the X+XO reaction stimulated Ca<sup>2+</sup> release through the IP<sub>3</sub>R in smooth muscle cells [89]. The effect of O<sub>2</sub><sup>•−</sup> was not seen when a nonhydrolyzable analogue of IP<sub>3</sub> was used to induce Ca<sup>2+</sup> release. This fact suggests that O<sub>2</sub><sup>•−</sup> inhibits the degradation processes of IP<sub>3</sub>, rather than directly stimulating the IP<sub>3</sub>R.

In cardiac myocytes IP<sub>3</sub> and NO signaling pathways are interconnected and affect Ca<sup>2+</sup> homeostasis and e–c coupling [90], however it remains to be determined whether and to what extent redox processes are involved.

### 3.3. Voltage-dependent L-type Ca<sup>2+</sup> channel

During e–c coupling membrane depolarization by an action potential leads to Ca<sup>2+</sup> influx through voltage-gated

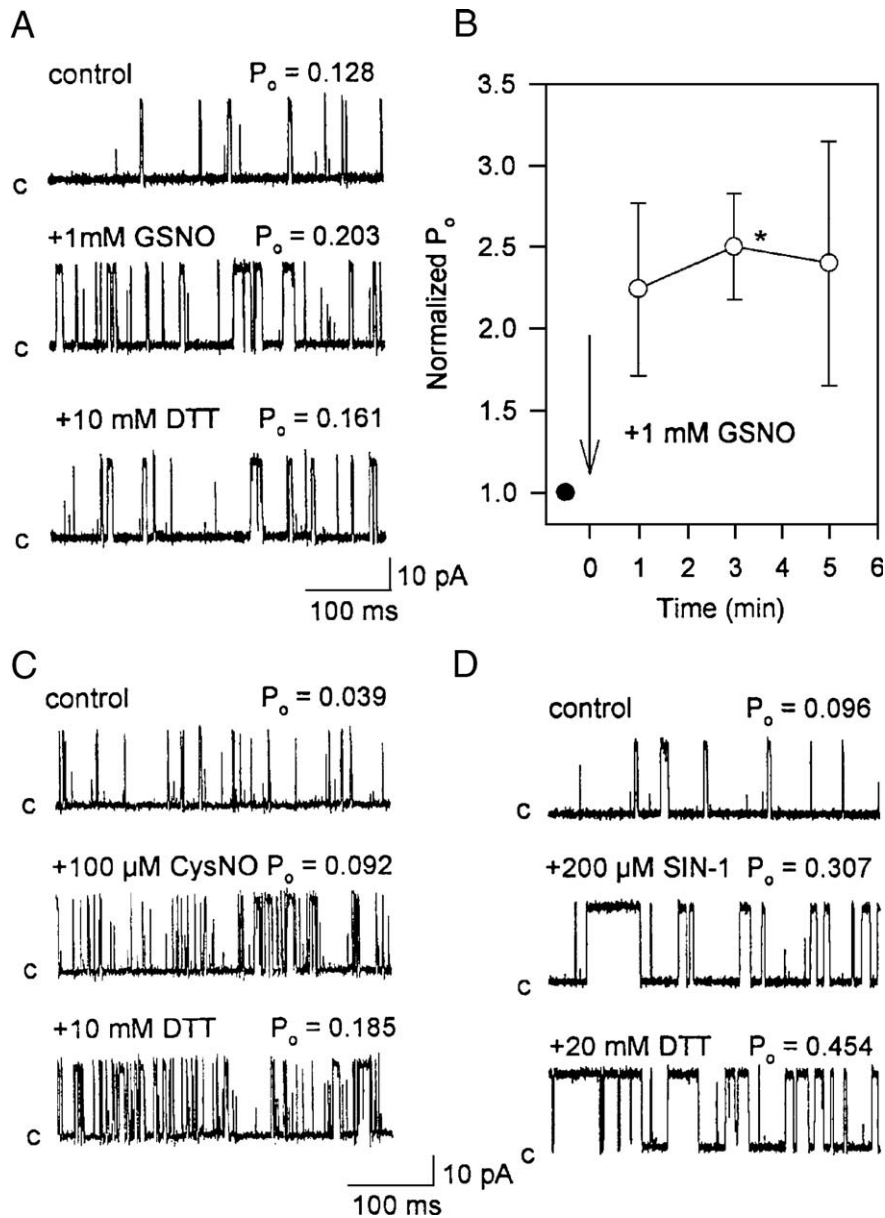

Fig. 3. Effects of GSNO (A, B), CysNO (C), and SIN-1 (D) on cardiac RyR activity. Reprinted with permission from Xu, L. et al., SCIENCE 279: 234–237 (9 January 1998). Copyright 1998 AAAS.

dihydropyridine-sensitive L-type  $Ca^{2+}$  channels which is followed by CICR from the SR. L-type  $Ca^{2+}$  channel contains 5 subunits ( $\alpha_1$ ,  $\alpha_2$ ,  $\beta$ ,  $\gamma$  and  $\delta$ ). The pore-forming subunit  $\alpha_{1C}$  of the cardiac L-type  $Ca^{2+}$  channel contain more than 10 cysteine residues [91] which can potentially undergo redox modification. Indeed, thiol oxidizing agents (e.g. thimerosal) irreversibly decreased current through the human  $\alpha_{1C}$  subunit (reversed by DTT) [92] and rabbit cardiac  $Ca^{2+}$  channels [93], both expressed in HEK293 cells. In isolated guinea pig ventricular myocytes DTT did not affect  $Ca^{2+}$  current ( $I_{Ca}$ ) directly, but reversed current inhibition by thiol oxidants [94]. Furthermore, ROS presumably acting as oxidants of SH groups, also decreased cardiac L-type  $I_{Ca}$  [95,96]. These results, however, are controversial because in ferret

ventricular myocytes agents that oxidize SH groups (DTNB) caused stimulation of  $I_{Ca}$ , whereas GSH and DTT which reduce disulfide bonds inhibited the current [97].

NO modulates cardiac L-type  $I_{Ca}$  by two different mechanisms, consisting of a direct redox-dependent stimulation and an indirect cGMP-dependent inhibition [97]. It has been shown that *S*-nitrosothiols (CysNO and GSNO) increased the amplitude of  $I_{Ca}$  and DTT partially reversed this effect in ferret ventricular myocytes [97]. NO-mediated stimulation of  $I_{Ca}$  was the result of *S*-nitrosylation of extracellular SH groups of the L-type  $Ca^{2+}$  channel, but was independent of the activity of kinases, phosphatases or SR  $Ca^{2+}$  release. In contrast to these results, *S*-nitrosothiols have been reported to inhibit  $Ba^{2+}$

currents through rabbit cardiac  $\text{Ca}^{2+}$  channel subunits expressed in HEK293 cells [93].

### 3.4. SR $\text{Ca}^{2+}$ ATPase (SERCA)

Relaxation of cardiac muscle relies on  $\text{Ca}^{2+}$  sequestration by SERCA into the SR. Three SERCA isoforms have been identified in muscle cells. SERCA1 isoform is predominant in fast skeletal muscle, whereas SERCA2a is expressed in slow skeletal and cardiac muscle. The SERCA2b isoform is the main isoform in smooth muscle, while SERCA3 is expressed in non-muscle cells. Redox agents are known to modulate SERCA. SERCA contains 25 cysteine residues, but only 1 or 2 are essential for enzyme action [98]. Thus, the redox state of these catalytic SH groups can determine the activity of the SR  $\text{Ca}^{2+}$  ATPase. In contrast to the RyR, reagents that oxidize thiols (e.g. DTNB) inhibit pump activity, whereas reducing agents (e.g. DTT and GSH) protect SERCA from this inhibition [99,100]. The activity of SERCA is also sensitive to oxidative stress.  $\text{O}_2^-$  and  $\text{H}_2\text{O}_2/\text{OH}^-$  inhibit  $\text{Ca}^{2+}$  uptake into the SR [5,58,100–103]. Because  $\text{Ca}^{2+}$  transport into the SR is tightly coupled to hydrolysis of ATP, inhibition of ATPase activity will ultimately decrease the  $\text{Ca}^{2+}$  pumping rate.  $\text{H}_2\text{O}_2/\text{OH}^-$  inactivates cardiac and skeletal muscle SERCA by directly interfering with the ATP binding site [103]. Furthermore, ROS cause inhibition of SERCA function by uncoupling  $\text{Ca}^{2+}$  uptake activity from ATP hydrolysis [5]. Additionally, ROS may inhibit the activity of membrane-bound enzymes by peroxidation of membrane phospholipids [100,101]. Despite the fact that all SERCA isoforms share 90% in amino acid homology, they exhibit different sensitivities to ROS. For example, cardiac SERCA2a has been found to be more sensitive to  $\text{H}_2\text{O}_2/\text{OH}^-$  than to  $\text{O}_2^-$  [5] and SERCA3 isoform is more resistant than SERCA2b to peroxides [102].

NO does not appear to affect SERCA  $\text{Ca}^{2+}$  pump activity by *S*-nitrosylation of cysteine residues directly [70,74,104], however  $\text{ONOO}^-$  was found to increase activity of SERCA2 [104]. This stimulation was dependent on GSH level and formation of *S*-glutathiolation adducts with cysteine residues of SERCA. In addition, mutation of residue Cys674 to serine abolished these effects. During pathological conditions that are associated with increases in ROS production, this mechanism of NO signaling is likely to be abolished as a result of irreversible oxidation of reactive SH groups (mainly Cys674) [104].

### 3.5. Plasmalemmal $\text{Ca}^{2+}$ ATPase (PMCA)

PMCA, like SERCA, is a member of P-type ATPases. Due to the slow pumping rate, however, PMCA activity is considered to be less relevant for beat-to-beat  $\text{Ca}^{2+}$  extrusion and cardiac relaxation [42]. ROS can substantially inhibit both  $\text{Ca}^{2+}$  transport and ATPase activity of PMCA [105,106]. These effects of ROS occur through oxidation of SH groups and peroxidation of membrane phospholipids.

Furthermore,  $\text{ONOO}^-$  irreversibly inhibited PMCA  $\text{Ca}^{2+}$  pump in rat brain synaptosomes [107], suggesting that a similar effect may occur in cardiac tissue.

### 3.6. $\text{Na}^+ - \text{Ca}^{2+}$ exchange (NCX)

Cardiac myocytes express sarcolemmal NCX protein at high levels, consistent with the important role of NCX for maintaining  $\text{Ca}^{2+}$  homeostasis. Using the transmembrane  $\text{Na}^+$  gradient, NCX typically pumps  $\text{Ca}^{2+}$  out of the cell electrogenically ( $\text{Na}^+:\text{Ca}^{2+}=3:1$ ), however membrane depolarization or high  $[\text{Na}^+]_i$  can cause  $\text{Ca}^{2+}$  entry via reverse mode action of NCX. Cardiac NCX (encoded by the gene NCX1) consists of nine transmembrane domains, and intramolecular disulfide bonds between cysteine residues of different domains have been implicated to be functionally relevant [108]. The activity of the cardiac NCX is sensitive to redox modification by ROS [109,110].  $\text{O}_2^-$  generated from the X+XO reaction (but not by  $\text{H}_2\text{O}_2$ ) substantially enhanced NCX-mediated  $\text{Ca}^{2+}$  fluxes [109]. Shown by a different study, NCX could also be stimulated by ROS generated from both  $\text{H}_2\text{O}_2$  and X+XO, but was inhibited by the strong oxidant HOCl [110]. Redox modification of NCX by the combination of  $\text{FeSO}_4$  and DTT removed  $\text{Na}^+$ -dependent inactivation of NCX and activated the exchanger [111]. These effects were not dependent on a rearrangement of disulfide bonds between cysteine residues. In isolated ventricular myocytes, ROS generated from  $\text{H}_2\text{O}_2$  and X+XO augmented NCX activity [112]. Because significant bursts of ROS generation occur during reperfusion of the ischemic heart, changes of NCX activity are likely to play an important role in ischemia-related  $\text{Ca}^{2+}$  overload. This is consistent with the observation that hypoxia profoundly inhibits NCX activity in guinea pig ventricular myocytes, whereas reoxygenation reactivates the exchanger [113]. Therefore, stimulation of NCX by ROS during reperfusion, when  $[\text{Na}^+]_i$  is elevated, may promote the reverse mode of NCX and lead to  $\text{Ca}^{2+}$  overload.

### 3.7. Other ion channels and transporters in the heart

Different types of cardiac  $\text{K}^+$  channels are sensitive to redox modulation. GSSG or DTNB inhibit the transient outward current ( $I_{to}$ ) through oxidation of SH groups on the channel protein in ventricular myocytes [114]. ROS can cause suppression of outward  $\text{K}^+$  currents [115], and inwardly rectifying  $\text{K}^+$  current [116]. It has been suggested that modulation of  $\text{K}^+$  channels by ROS results in early afterdepolarizations and arrhythmias [117]. In contrast to inhibition of  $\text{K}^+$  channels that contribute to action potential configuration under normal physiological conditions, ROS stimulate the ATP-sensitive  $\text{K}^+$  channel that usually becomes activated under pathological conditions of the heart involving ATP depletion [96,118]. Furthermore, redox-dependent modulation of activity of  $\text{Na}^+ - \text{K}^+$  ATPase [119] and  $\text{Na}^+ - \text{H}^+$  [120] exchange has been reported.



#### 4. Conclusion

Redox modulation of biochemical pathways and signaling cascades extends to  $\text{Ca}^{2+}$  channels and transporters, and underlies a number of cardiac dysfunctions and pathologies. There is a tendency that oxidation of ion transport systems that participate in cardiac e–c coupling can potentially lead to  $\text{Ca}^{2+}$  overload, whereas reduction tends to have an opposite effect. For example, ROS increase  $[\text{Ca}^{2+}]_i$  by stimulation of SR  $\text{Ca}^{2+}$  release via RyRs (or  $\text{IP}_3$ Rs) and activation  $\text{Ca}^{2+}$  entry via the reverse mode of NCX. On the other hand, oxidative stress decreases of  $\text{Ca}^{2+}$  sequestration and extrusion by inhibiting SERCA and PMCA. All these ROS effects can take place during reperfusion of the ischemic heart and are likely to be responsible for abnormalities of  $\text{Ca}^{2+}$  homeostasis and e–c coupling.

#### Acknowledgments

This work was supported by the NIH (NIH R01HL62231 to LAB) and AHA (AHA0530309Z to AVZ and AHA0550170Z to LAB).

#### References

- [1] Kourie JI. Interaction of reactive oxygen species with ion transport mechanisms. *Am J Physiol* 1998;275:C1–24.
- [2] Pessah IN, Kim KH, Feng W. Redox sensing properties of the ryanodine receptor complex. *Front Biosci* 2002;7:a72–9.
- [3] Waring P. Redox active calcium ion channels and cell death. *Arch Biochem Biophys* 2005;434:33–42.
- [4] Kawakami M, Okabe E. Superoxide anion radical-triggered  $\text{Ca}^{2+}$  release from cardiac sarcoplasmic reticulum through ryanodine receptor  $\text{Ca}^{2+}$  channel. *Mol Pharmacol* 1998;53:497–503.
- [5] Rowe GT, Manson NH, Caplan M, Hess ML. Hydrogen peroxide and hydroxyl radical mediation of activated leukocyte depression of cardiac sarcoplasmic reticulum. Participation of the cyclooxygenase pathway. *Circ Res* 1983;53:584–91.
- [6] Griffith OW. Biologic and pharmacologic regulation of mammalian glutathione synthesis. *Free Radic Biol Med* 1999;27:922–35.
- [7] Palace V, Kumar D, Hill MF, Khaper N, Singal PK. Regional differences in non-enzymatic antioxidants in the heart under control and oxidative stress conditions. *J Mol Cell Cardiol* 1999;31:193–202.
- [8] Lin SJ, Guarente L. Nicotinamide adenine dinucleotide, a metabolic regulator of transcription, longevity and disease. *Curr Opin Cell Biol* 2003;15:241–6.
- [9] Opie LH. *The heart: physiology, from cell to circulation*. New York: Raven Press; 1998. p. 515–41.
- [10] Park JW, Chun YS, Kim MS, Park YC, Kwak SJ, Park SC. Metabolic modulation of cellular redox potential can improve cardiac recovery from ischemia–reperfusion injury. *Int J Cardiol* 1998;65:139–47.
- [11] Xu KY, Becker LC. Ultrastructural localization of glycolytic enzymes on sarcoplasmic reticulum vesicles. *J Histochem Cytochem* 1998;46:419–27.
- [12] Yamawaki H, Haendeler J, Berk BC. Thioredoxin: a key regulator of cardiovascular homeostasis. *Circ Res* 2003;93:1029–33.
- [13] Kang SW, Chae HZ, Seo MS, Kim K, Baines IC, Rhee SG. Mammalian peroxiredoxin isoforms can reduce hydrogen peroxide generated in response to growth factors and tumor necrosis factor- $\alpha$ . *J Biol Chem* 1998;273:6297–302.
- [14] Tao L, Gao E, Bryan NS, Qu Y, Liu HR, Hu A, et al. Cardioprotective effects of thioredoxin in myocardial ischemia and reperfusion: role of S-nitrosation. *Proc Natl Acad Sci* 2004;101:11471–6.
- [15] Hess ML, Manson NH. Molecular oxygen: friend and foe. The role of the oxygen free radical system in the calcium paradox, the oxygen paradox and ischemia/reperfusion injury. *J Mol Cell Cardiol* 1984;16:969–85.
- [16] Suzuki YJ, Ford GD. Redox regulation of signal transduction in cardiac and smooth muscle. *J Mol Cell Cardiol* 1999;31:345–53.
- [17] Chen HW, Chien CT, Yu SL, Lee YT, Chen WJ. Cyclosporine A regulate oxidative stress-induced apoptosis in cardiomyocytes: mechanisms via ROS generation, iNOS and Hsp70. *Br J Pharmacol* 2002;137:771–81.
- [18] Kevin LG, Novalija E, Stowe DF. Reactive oxygen species as mediators of cardiac injury and protection: the relevance to anesthesia practice. *Anesth Analg* 2005;101:1275–87.
- [19] Zorov DB, Filburn CR, Klotz LO, Zweier JL, Sollott SJ. Reactive oxygen species (ROS)-induced ROS release: a new phenomenon accompanying induction of the mitochondrial permeability transition in cardiac myocytes. *J Exp Med* 2000;192:1001–14.
- [20] Zweier JL, Flaherty JT, Weisfeldt ML. Direct measurement of free radical generation following reperfusion of ischemic myocardium. *Proc Natl Acad Sci U S A* 1987;84:1404–7.
- [21] Vanden Hoek TL, Li C, Shao Z, Schumacker PT, Becker LB. Significant levels of oxidants are generated by isolated cardiomyocytes during ischemia prior to reperfusion. *J Mol Cell Cardiol* 1997;29:2571–83.
- [22] Sharikabad MN, Ostbye KM, Lyberg T, Brors O. Effect of extracellular  $\text{Mg}^{2+}$  on ROS and  $\text{Ca}^{2+}$  accumulation during reoxygenation of rat cardiomyocytes. *Am J Physiol* 2001;280:H344–53.
- [23] Mohazzab-H KM, Kaminski PM, Wolin MS. Lactate and  $p\text{O}_2$  modulate superoxide anion production in bovine cardiac myocytes: potential role of NADH oxidase. *Circulation* 1997;96:614–20.
- [24] Bassenge E, Sommer O, Schwemmer M, Bunger R. Antioxidant pyruvate inhibits cardiac formation of reactive oxygen species through changes in redox state. *Am J Physiol* 2000;279:H2431–8.
- [25] Temsah RM, Neticadan T, Chapman D, Takeda S, Mochizuki S, Dhalla NS. Alterations in sarcoplasmic reticulum function and gene expression in ischemic-reperfused rat heart. *Am J Physiol* 1999;277:H584–94.
- [26] Gen W, Tani M, Takeshita J, Ebihara Y, Tamaki K. Mechanisms of  $\text{Ca}^{2+}$  overload induced by extracellular  $\text{H}_2\text{O}_2$  in quiescent isolated rat cardiomyocytes. *Basic Res Cardiol* 2001;96:623–9.
- [27] Xiao L, Pimentel DR, Wang J, Singh K, Colucci WS, Sawyer DB. Role of reactive oxygen species and NAD(P)H oxidase in  $\alpha 1$ -adrenoceptor signaling in adult rat cardiac myocytes. *Am J Physiol* 2002;282:C926–34.
- [28] Okabe E, Tsujimoto Y, Kobayashi Y. Calmodulin and cyclic ADP–ribose interaction in  $\text{Ca}^{2+}$  signaling related to cardiac sarcoplasmic reticulum: superoxide anion radical-triggered  $\text{Ca}^{2+}$  release. *Antioxid Redox Signal* 2000;2:47–54.
- [29] Otani H. Reactive oxygen species as mediators of signal transduction in ischemic preconditioning. *Antioxid Redox Signal* 2004;6:449–69.
- [30] Feron O, Michel JB, Sase K, Michel T. Dynamic regulation of endothelial nitric oxide synthase: complementary roles of dual acylation and caveolin interactions. *Biochemistry* 1998;37:193–200.
- [31] Barouch LA, Harrison RW, Skaf MW, Rosas GO, Cappola TP, Kobeissi ZA, et al. Nitric oxide regulates the heart by spatial confinement of nitric oxide synthase isoforms. *Nature* 2002;416:337–9.
- [32] Xu KY, Huso DL, Dawson TM, Bredt DS, Becker LC. Nitric oxide synthase in cardiac sarcoplasmic reticulum. *Proc Natl Acad Sci U S A* 1999;96:657–62.

- [34] Vasquez-Vivar J, Kalyanaraman B, Martasek P, Hogg N, Masters BS, Karoui H, et al. Superoxide generation by endothelial nitric oxide synthase: the influence of cofactors. *Proc Natl Acad Sci U S A* 1998;95:9220–5.
- [35] Pou S, Pou WS, Bredt DS, Snyder SH, Rosen GM. Generation of superoxide by purified brain nitric oxide synthase. *J Biol Chem* 1992;267:24173–6.
- [36] Ferdinandy P, Schulz R. Nitric oxide, superoxide, and peroxynitrite in myocardial ischaemia–reperfusion injury and preconditioning. *Br J Pharmacol* 2003;138:532–43.
- [37] Balligand JL, Cannon PJ. Nitric oxide synthases and cardiac muscle. Autocrine and paracrine influences. *Arterioscler Thromb Vasc Biol* 1997;17:1846–58.
- [38] Finkel MS, Oddis CV, Jacob TD, Watkins SC, Hattler BG, Simmons RL. Negative inotropic effects of cytokines on the heart mediated by nitric oxide. *Science* 1992;257:387–9.
- [39] Kanai AJ, Pearce LL, Clemens PR, Birder LA, VanBibber MM, Choi SY, et al. Identification of a neuronal nitric oxide synthase in isolated cardiac mitochondria using electrochemical detection. *Proc Natl Acad Sci U S A* 2001;98:14126–31.
- [40] Fabiato A. Calcium-induced release of calcium from the cardiac sarcoplasmic reticulum. *Am J Physiol* 1983;245:C1–14.
- [41] Cheng H, Lederer WJ, Cannell MB. Calcium sparks: elementary events underlying excitation–contraction coupling in heart muscle. *Science* 1993;262:740–4.
- [42] Bers DM. Excitation–contraction coupling and cardiac contractile force. Second edition. Dordrecht (NL): Kluwer Academic Publishers; 2001.
- [43] Fill M, Copello JA. Ryanodine receptor calcium release channels. *Physiol Rev* 2002;82:893–922.
- [44] Xu L, Eu JP, Meissner G, Stamler JS. Activation of the cardiac calcium release channel (ryanodine receptor) by poly-S-nitrosylation. *Science* 1998;279:234–7.
- [45] Abramson JJ, Salama G. Critical sulfhydryls regulate calcium release from sarcoplasmic reticulum. *J Bioenerg Biomembr* 1989; 21:283–94.
- [46] Liu G, Abramson JJ, Zable AC, Pessah IN. Direct evidence for the existence and functional role of hyperreactive sulfhydryls on the ryanodine receptor–triadin complex selectively labeled by the coumarin maleimide 7-diethylamino-3-(4-maleimidylphenyl)-4-methylcoumarin. *Mol Pharmacol* 1994;45:189–200.
- [47] Eager KR, Roden LD, Dulhunty AF. Actions of sulfhydryl reagents on single ryanodine receptor  $Ca^{2+}$ -release channels from sheep myocardium. *Am J Physiol* 1997;272:C1908–18.
- [48] Zable AC, Favero TG, Abramson JJ. Glutathione modulates ryanodine receptor from skeletal muscle sarcoplasmic reticulum. Evidence for redox regulation of the  $Ca^{2+}$  release mechanism. *J Biol Chem* 1997;272:7069–77.
- [49] Haarmann CS, Fink RH, Dulhunty AF. Oxidation and reduction of pig skeletal muscle ryanodine receptors. *Biophys J* 1999;77: 3010–22.
- [50] Xia R, Stangler T, Abramson JJ. Skeletal muscle ryanodine receptor is a redox sensor with a well defined redox potential that is sensitive to channel modulators. *J Biol Chem* 2000;275:36556–61.
- [51] Sun J, Xu L, Eu JP, Stamler JS, Meissner G. Classes of thiols that influence the activity of the skeletal muscle calcium release channel. *J Biol Chem* 2001;276:15625–30.
- [52] Eager KR, Dulhunty AF. Activation of the cardiac ryanodine receptor by sulfhydryl oxidation is modified by  $Mg^{2+}$  and ATP. *J Membr Biol* 1998;163:9–18.
- [53] Marengo JJ, Hidalgo C, Bull R. Sulfhydryl oxidation modifies the calcium dependence of ryanodine-sensitive calcium channels of excitable cells. *Biophys J* 1998;74:1263–77.
- [54] Gyorke I, Hester N, Jones LR, Gyorke S. The role of calsequestrin, triadin, and junctin in conferring cardiac ryanodine receptor responsiveness to luminal calcium. *Biophys J* 2004;86: 2121–8.
- [55] Feng W, Liu G, Allen PD, Pessah IN. Transmembrane redox sensor of ryanodine receptor complex. *J Biol Chem* 2000;275: 35902–7.
- [56] Balshaw DM, Xu L, Yamaguchi N, Pasek DA, Meissner G. Calmodulin binding and inhibition of cardiac muscle calcium release channel (ryanodine receptor). *J Biol Chem* 2001;276: 20144–53.
- [57] Zima AV, Copello JA, Blatter LA. Differential modulation of cardiac and skeletal muscle ryanodine receptors by NADH. *FEBS Lett* 2003;547:32–6.
- [58] Zima AV, Copello JA, Blatter LA. Effects of cytosolic NADH/NAD<sup>+</sup> levels on sarcoplasmic reticulum  $Ca^{2+}$  release in permeabilized rat ventricular myocytes. *J Physiol* 2004;555:727–41.
- [59] Cherednichenko G, Zima AV, Feng W, Schaefer S, Blatter LA, Pessah IN. NADH oxidase activity of rat cardiac sarcoplasmic reticulum regulates calcium-induced calcium release. *Circ Res* 2004;94:478–86.
- [60] Baker ML, Serysheva II, Sencer S, Wu Y, Ludtke SJ, Jiang W, et al. The skeletal muscle  $Ca^{2+}$  release channel has an oxidoreductase-like domain. *Proc Natl Acad Sci U S A* 2002;99:12155–60.
- [61] Boraso A, Williams AJ. Modification of the gating of the cardiac sarcoplasmic reticulum  $Ca^{2+}$ -release channel by  $H_2O_2$  and dithiothreitol. *Am J Physiol* 1994;267:H1010–6.
- [62] Oba T, Koshita M, Yamaguchi M.  $H_2O_2$  modulates twitch tension and increases  $P_o$  of  $Ca^{2+}$  release channel in frog skeletal muscle. *Am J Physiol* 1996;271:C810–8.
- [63] Anzai K, Ogawa K, Kuniyasu A, Ozawa T, Yamamoto H, Nakayama H. Effects of hydroxyl radical and sulfhydryl reagents on the open probability of the purified cardiac ryanodine receptor channel incorporated into planar lipid bilayers. *Biochem Biophys Res Commun* 1998;249:938–42.
- [64] Holmberg SR, Cumming DV, Kusama Y, Hearse DJ, Poole-Wilson PA, Shattock MJ, et al. Reactive oxygen species modify the structure and function of the cardiac sarcoplasmic reticulum calcium-release channel. *Cardioscience* 1991;2:19–25.
- [65] Haugland RP. Handbook of fluorescent probes and research chemicals. Eugene (OR, USA): Molecular Probes; 1996.
- [66] Xia R, Webb JA, Gnall LL, Cutler K, Abramson JJ. Skeletal muscle sarcoplasmic reticulum contains a NADH-dependent oxidase that generates superoxide. *Am J Physiol* 2003;285:C215–21.
- [67] Sanchez G, Pedrozo Z, Domenech RJ, Hidalgo C, Donoso P. Tachycardia increases NADPH oxidase activity and RyR2 S-glutathionylation in ventricular muscle. *J Mol Cell Cardiol* 2005; 39:982–91.
- [68] Ignarro LJ. Biosynthesis and metabolism of endothelium-derived nitric oxide. *Annu Rev Pharmacol Toxicol* 1990;30:535–60.
- [69] Broillet MC. S-nitrosylation of proteins. *Cell Mol Life Sci* 1999; 55:1036–42.
- [70] Stoyanovsky D, Murphy T, Anno PR, Kim YM, Salama G. Nitric oxide activates skeletal and cardiac ryanodine receptors. *Cell Calcium* 1997;21:19–29.
- [71] Zahradnikova A, Minarovic I, Venema RC, Meszaros LG. Inactivation of the cardiac ryanodine receptor calcium release channel by nitric oxide. *Cell Calcium* 1997;22:447–54.
- [72] Hart JD, Dulhunty AF. Nitric oxide activates or inhibits skeletal muscle ryanodine receptors depending on its concentration, membrane potential and ligand binding. *J Membr Biol* 2000;173: 227–36.
- [73] Sun J, Xin C, Eu JP, Stamler JS, Meissner G. Cysteine-3635 is responsible for skeletal muscle ryanodine receptor modulation by NO. *Proc Natl Acad Sci U S A* 2001;98:11158–62.
- [74] Eu JP, Sun J, Xu L, Stamler JS, Meissner G. The skeletal muscle calcium release channel: coupled  $O_2$  sensor and NO signaling functions. *Cell* 2000;102:499–509.
- [75] Cheong E, Tumbey V, Stoyanovsky D, Salama G. Effects of  $pO_2$  on the activation of skeletal muscle ryanodine receptors by NO: a cautionary note. *Cell Calcium* 2005;38:481–8.

- [76] Sun J, Xu L, Eu JP, Stamler JS, Meissner G. Nitric oxide, NOC-12, and *S*-nitrosoglutathione modulate the skeletal muscle calcium release channel/ryanodine receptor by different mechanisms. An allosteric function for O<sub>2</sub> in *S*-nitrosylation of the channel. *J Biol Chem* 2003;278:8184–9.
- [77] Cheong E, Tumbe V, Abramson J, Salama G, Stoyanovsky DA. Nitroxyl triggers Ca<sup>2+</sup> release from skeletal and cardiac sarcoplasmic reticulum by oxidizing ryanodine receptors. *Cell Calcium* 2005;37:87–96.
- [78] Sudhof TC, Newton CL, Archer BT III, Ushkaryov YA, Mignery GA. Structure of a novel InsP<sub>3</sub> receptor. *EMBO J* 1991;10:3199–206.
- [79] Berridge MJ. Inositol trisphosphate and calcium signalling. *Nature* 1993;361:315–25.
- [80] Perez PJ, Ramos-Franco J, Fill M, Mignery GA. Identification and functional reconstitution of the Type-2 InsP<sub>3</sub> receptor from ventricular cardiac myocytes. *J Biol Chem* 1997;272:23961–9.
- [81] Blatter LA, Kocksämper J, Sheehan KA, Zima AV, Hüser J, Lipsius SL. Local calcium gradients during excitation–contraction coupling and alternans in atrial myocytes. *J Physiol* 2003;546:19–31.
- [82] Mackenzie L, Bootman MD, Laine M, Berridge MJ, Thuring J, Holmes A, et al. The role of inositol 1,4,5-trisphosphate receptors in Ca<sup>2+</sup> signalling and the generation of arrhythmias in rat atrial myocytes. *J Physiol* 2002;541:395–409.
- [83] Zima AV, Blatter LA. Inositol-1,4,5-trisphosphate-dependent Ca<sup>2+</sup> signalling in cat atrial excitation–contraction coupling and arrhythmias. *J Physiol* 2004;555:607–15.
- [84] Bootman MD, Taylor CW, Berridge MJ. The thiol reagent, thimerosal, evokes Ca<sup>2+</sup> spikes in HeLa cells by sensitizing the inositol 1,4,5-trisphosphate receptor. *J Biol Chem* 1992;267:25113–9.
- [85] Renard-Rooney DC, Joseph SK, Seitz MB, Thomas AP. Effect of oxidized glutathione and temperature on inositol 1,4,5-trisphosphate binding in permeabilized hepatocytes. *Biochem J* 1995;310:185–92.
- [86] Patterson RL, van Rossum DB, Kaplin AI, Barrow RK, Snyder SH. Inositol 1,4,5-trisphosphate receptor/GAPDH complex augments Ca<sup>2+</sup> release via locally derived NADH. *Proc Natl Acad Sci U S A* 2005;102:1357–9.
- [87] Kaplin AI, Snyder SH, Linden DJ. Reduced nicotinamide adenine dinucleotide-selective stimulation of inositol 1,4,5-trisphosphate receptors mediates hypoxic mobilization of calcium. *J Neurosci* 1996;16:2002–11.
- [88] Rooney TA, Renard DC, Sass EJ, Thomas AP. Oscillatory cytosolic calcium waves independent of stimulated inositol 1,4,5-trisphosphate formation in hepatocytes. *J Biol Chem* 1991;266:12272–82.
- [89] Suzuki YJ, Ford GD. Superoxide stimulates IP<sub>3</sub>-induced Ca<sup>2+</sup> release from vascular smooth muscle sarcoplasmic reticulum. *Am J Physiol* 1992;262:H114–6.
- [90] Wang YG, Dedkova EN, Ji X, Blatter LA, Lipsius SL. Phenylephrine acts via IP<sub>3</sub>-dependent intracellular NO release to stimulate L-type Ca<sup>2+</sup> current in cat atrial myocytes. *J Physiol* 2005;567:143–57.
- [91] Mikami A, Imoto K, Tanabe T, Niidome T, Mori Y, Takeshima H, et al. Primary structure and functional expression of the cardiac dihydropyridine-sensitive calcium channel. *Nature* 1989;340:230–3.
- [92] Fearon IM, Palmer AC, Balmforth AJ, Ball SG, Varadi G, Peers C. Modulation of recombinant human cardiac L-type Ca<sup>2+</sup> channel  $\alpha 1C$  subunits by redox agents and hypoxia. *J Physiol* 1999;514:629–37.
- [93] Hu H, Chiamvimonvat N, Yamagishi T, Marban E. Direct inhibition of expressed cardiac L-type Ca<sup>2+</sup> channels by *S*-nitrosothiol nitric oxide donors. *Circ Res* 1997;81:742–52.
- [94] Lacampagne A, Duittoz A, Bolanos P, Peineau N, Argibay JA. Effect of sulphhydryl oxidation on ionic and gating currents associated with L-type calcium channels in isolated guinea-pig ventricular myocytes. *Cardiovasc Res* 1995;30:799–806.
- [95] Gill JS, McKenna WJ, Camm A. Free radicals irreversibly decrease Ca<sup>2+</sup> currents in isolated guinea-pig ventricular myocytes. *Eur J Pharmacol* 1995;292:337–40.
- [96] Goldhaber JJ, Ji S, Lamp ST, Weiss JN. Effects of exogenous free radicals on electromechanical function and metabolism in isolated rabbit and guinea pig ventricle. Implications for ischemia and reperfusion injury. *J Clin Invest* 1989;83:1800–9.
- [97] Campbell DL, Stamler JS, Strauss HC. Redox modulation of L-type calcium channels in ferret ventricular myocytes. Dual mechanism regulation by nitric oxide and *S*-nitrosothiols. *J Gen Physiol* 1996;108:277–93.
- [98] Murphy AJ. Sulfhydryl group modification of sarcoplasmic reticulum membranes. *Biochemistry* 1976;15:4492–6.
- [99] Scherer NM, Deamer DW. Oxidative stress impairs the function of sarcoplasmic reticulum by oxidation of sulfhydryl groups in the Ca<sup>2+</sup>-ATPase. *Arch Biochem Biophys* 1986;246:589–601.
- [100] Morris TE, Sulakhe PV. Sarcoplasmic reticulum Ca<sup>2+</sup>-pump dysfunction in rat cardiomyocytes briefly exposed to hydroxyl radicals. *Free Radic Biol Med* 1997;22:37–47.
- [101] Kukreja RC, Okabe E, Schrier GM, Hess ML. Oxygen radical-mediated lipid peroxidation and inhibition of Ca<sup>2+</sup> ATPase activity of cardiac sarcoplasmic reticulum. *Arch Biochem Biophys* 1988;261:447–57.
- [102] Grover AK, Samson SE, Misquitta CM. Sarco(endo)plasmic reticulum Ca<sup>2+</sup> pump isoform SERCA3 is more resistant than SERCA2b to peroxide. *Am J Physiol* 1997;273:C420–5.
- [103] Xu KY, Zweier JL, Becker LC. Hydroxyl radical inhibits sarcoplasmic reticulum Ca<sup>2+</sup>-ATPase function by direct attack on the ATP binding site. *Circ Res* 1997;80:76–81.
- [104] Adachi T, Weisbrod RM, Pimentel DR, Ying J, Sharov VS, Schoneich C, et al. *S*-Glutathiolation by peroxynitrite activates SERCA during arterial relaxation by nitric oxide. *Nat Med* 2004;10:1200–7.
- [105] Kaneko M, Beamish RE, Dhalla NS. Depression of heart sarcolemmal Ca<sup>2+</sup>-pump activity by oxygen free radicals. *Am J Physiol* 1989;256:H368–74.
- [106] Kaneko M, Elimban V, Dhalla NS. Mechanism for depression of heart sarcolemmal Ca<sup>2+</sup> pump by oxygen free radicals. *Am J Physiol* 1989;257:H804–11.
- [107] Gutierrez-Martin Y, Martin-Romero FJ, Henao F, Gutierrez-Merino C. Synaptosomal plasma membrane Ca<sup>2+</sup> pump activity inhibition by repetitive micromolar ONOO<sup>-</sup> pulses. *Free Radic Biol Med* 2002;32:46–55.
- [108] Nicoll DA, Ottolia M, Lu L, Lu Y, Philipson KD. A new topological model of the cardiac sarcolemmal Na<sup>+</sup>–Ca<sup>2+</sup> exchanger. *J Biol Chem* 1999;274:910–7.
- [109] Reeves JP, Bailey CA, Hale CC. Redox modification of sodium–calcium exchange activity in cardiac sarcolemmal vesicles. *J Biol Chem* 1986;261:4948–55.
- [110] Kato M, Kako KJ. Na<sup>+</sup>/Ca<sup>2+</sup> exchange of isolated sarcolemmal membrane: effects of insulin, oxidants and insulin deficiency. *Mol Cell Biochem* 1988;83:15–25.
- [111] Santacruz-Toloz L, Ottolia M, Nicoll DA, Philipson KD. Functional analysis of a disulfide bond in the cardiac Na<sup>+</sup>–Ca<sup>2+</sup> exchanger. *J Biol Chem* 2000;275:182–8.
- [112] Goldhaber JJ. Free radicals enhance Na<sup>+</sup>/Ca<sup>2+</sup> exchange in ventricular myocytes. *Am J Physiol* 1996;271:H823–33.
- [113] Eigel BN, Gursahani H, Hadley RW. ROS are required for rapid reactivation of Na<sup>+</sup>/Ca<sup>2+</sup> exchanger in hypoxic reoxygenated guinea pig ventricular myocytes. *Am J Physiol* 2004;286:H955–63.
- [114] Rozanski GJ, Xu Z. Sulfhydryl modulation of K<sup>+</sup> channels in rat ventricular myocytes. *J Mol Cell Cardiol* 2002;34:1623–32.
- [115] Cerbai E, Ambrosio G, Porciatti F, Chiariello M, Giotti A, Mugelli A. Cellular electrophysiological basis for oxygen radical-induced arrhythmias. A patch-clamp study in guinea pig ventricular myocytes. *Circulation* 1991;84:1773–82.
- [116] Nakaya H, Takeda Y, Tohse N, Kanno M. Mechanism of the membrane depolarization induced by oxidative stress in guinea-pig ventricular cells. *J Mol Cell Cardiol* 1992;24:523–34.

- [117] Coetzee WA, Opie LH. Effects of oxygen free radicals on isolated cardiac myocytes from guinea-pig ventricle: electrophysiological studies. *J Mol Cell Cardiol* 1992;24:651–63.
- [118] Tokube K, Kiyosue T, Arita M. Openings of cardiac KATP channel by oxygen free radicals produced by xanthine oxidase reaction. *Am J Physiol* 1996;271:H478–89.
- [119] Kukreja RC, Weaver AB, Hess ML. Sarcolemmal  $\text{Na}^+ - \text{K}^+$ -ATPase: inactivation by neutrophil-derived free radicals and oxidants. *Am J Physiol* 1990;259:H1330–6.
- [120] Xie ZJ, Wang YH, Askari A, Huang WH, Klaunig JE, Askari A. Studies on the specificity of the effects of oxygen metabolites on cardiac sodium pump. *J Mol Cell Cardiol* 1990;22:911–20.
